# Supplementary material
Source: PubMed Central journal article supplement (PMC8463956)
Supplement: mmc3.pdf [file mmc3.pdf]

**Supplemental Table S1. Prevalence of myopia and its severity among Chinese schoolchildren**

| Characteristic              | Prevalence (95% CI)       |                           |                                 |                           |                                  |                           |
|-----------------------------|---------------------------|---------------------------|---------------------------------|---------------------------|----------------------------------|---------------------------|
|                             | Baseline<br>(Jun-2019)    |                           | 6-month follow-up<br>(Dec-2019) |                           | 12-month follow-up<br>(Jun-2020) |                           |
|                             | Myopia                    | High myopia               | Myopia                          | High myopia               | Myopia                           | High myopia               |
| <b>Total</b>                | 52.89%<br>(52.79%-52.99%) | 4.11%<br>(4.07%-4.15%)    | 53.9%<br>(53.79%-54.01%)        | 4.24%<br>(4.2%-4.29%)     | 59.35%<br>(59.24%-59.46%)        | 4.99%<br>(4.94%-5.04%)    |
| <b>Gender</b>               |                           |                           |                                 |                           |                                  |                           |
| Male                        | 50.37%<br>(50.24%-50.51%) | 4.01%<br>(3.96%-4.07%)    | 51.51%<br>(51.37%-51.66%)       | 4.18%<br>(4.12%-4.24%)    | 56.6%<br>(56.45%-56.75%)         | 4.92%<br>(4.86%-4.99%)    |
| Female                      | 55.96%<br>(55.82%-56.11%) | 4.23%<br>(4.17%-4.29%)    | 56.79%<br>(56.63%-56.95%)       | 4.32%<br>(4.25%-4.39%)    | 62.67%<br>(62.51%-62.83%)        | 5.07%<br>(4.99%-5.14%)    |
| <b>Educational Level</b>    |                           |                           |                                 |                           |                                  |                           |
| Elementary school           | 35.41%<br>(35.29%-35.53%) | 0.82%<br>(0.8%-0.85%)     | 34.38%<br>(34.24%-34.53%)       | 0.72%<br>(0.69%-0.74%)    | 42.82%<br>(42.67%-42.97%)        | 1.12%<br>(1.08%-1.15%)    |
| Junior high school          | 74.01%<br>(73.84%-74.18%) | 6.32%<br>(6.23%-6.42%)    | 71.71%<br>(71.53%-71.9%)        | 5.48%<br>(5.38%-5.57%)    | 75.25%<br>(75.06%-75.43%)        | 6.78%<br>(6.67%-6.88%)    |
| Senior high school          | 81.26%<br>(81.07%-81.44%) | 12.03%<br>(11.87%-12.18%) | 81.68%<br>(81.49%-81.88%)       | 12.21%<br>(12.05%-12.38%) | 82.57%<br>(82.38%-82.77%)        | 13.34%<br>(13.17%-13.52%) |
| <b>Educational System</b>   |                           |                           |                                 |                           |                                  |                           |
| Non-Key school              | 51.39%<br>(51.28%-51.5%)  | 3.49%<br>(3.45%-3.53%)    | 52.16%<br>(52.04%-52.28%)       | 3.51%<br>(3.47%-3.56%)    | 57.98%<br>(57.86%-58.1%)         | 4.37%<br>(4.32%-4.42%)    |
| Key school                  | 58.69%<br>(58.48%-58.9%)  | 6.52%<br>(6.41%-6.63%)    | 60.88%<br>(60.64%-61.11%)       | 7.18%<br>(7.05%-7.31%)    | 64.92%<br>(64.68%-65.16%)        | 7.5%<br>(7.37%-7.63%)     |
| <b>Region of Habitation</b> |                           |                           |                                 |                           |                                  |                           |
| Rural                       | 47.36%<br>(47.11%-47.6%)  | 2.85%<br>(2.76%-2.93%)    | 48.35%<br>(48.08%-48.63%)       | 2.99%<br>(2.9%-3.08%)     | 53.36%<br>(53.08%-53.64%)        | 3.66%<br>(3.56%-3.77%)    |
| Urban                       | 55.66%<br>(55.55%-55.77%) | 4.62%<br>(4.57%-4.67%)    | 56.38%<br>(56.26%-56.5%)        | 4.72%<br>(4.66%-4.77%)    | 62.05%<br>(61.92%-62.18%)        | 5.49%<br>(5.43%-5.54%)    |
