# Supplementary material
Source: PubMed Central journal article supplement (PMC8463956)

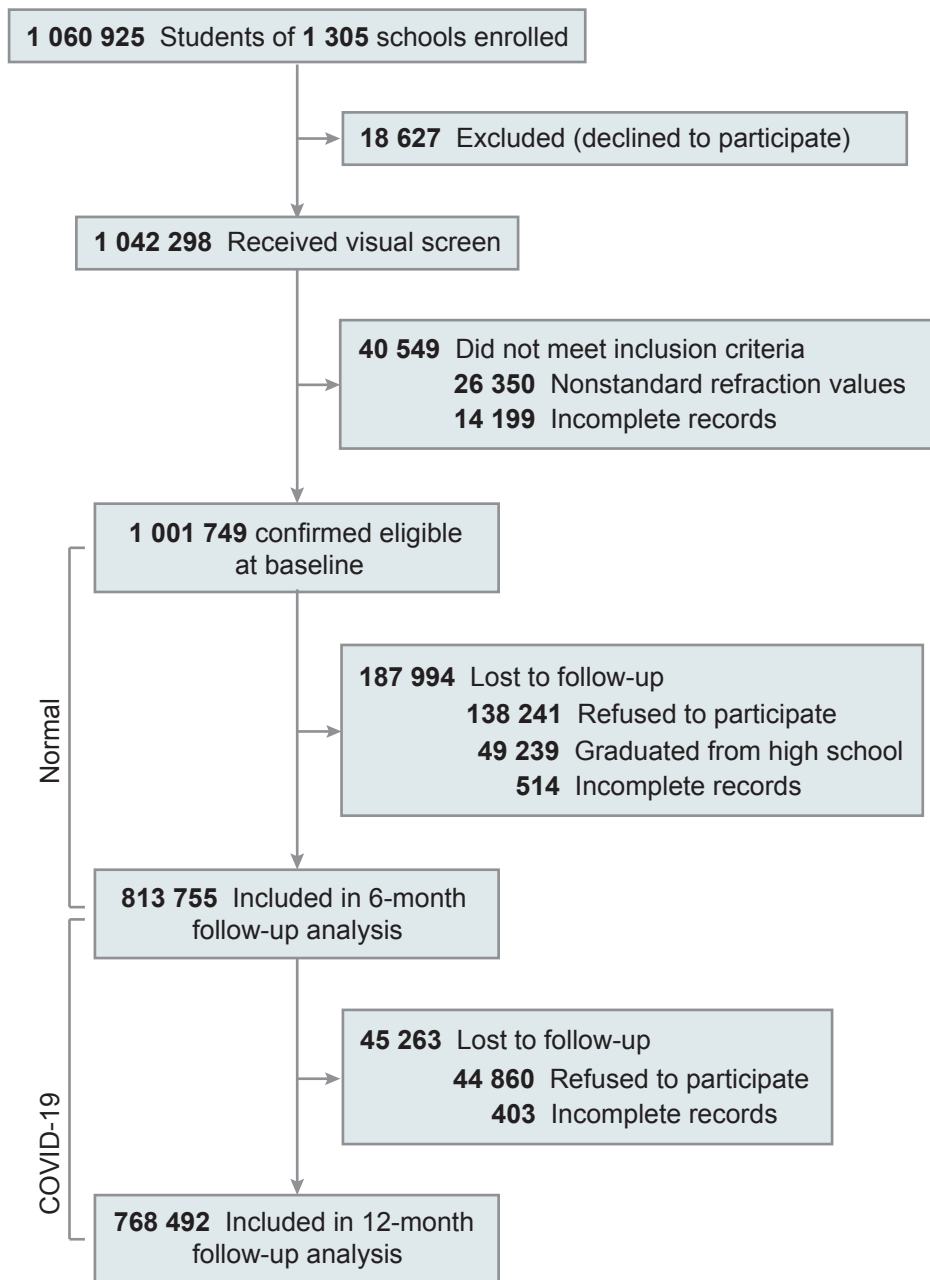

**Supplemental Figure S1. Flow of participants in the current study with 12-month follow-up.**

Supplement: mmc1.pdf [file mmc1.pdf]
